# Supplementary material for: Portable apparatus for high spatial and temporal resolution of in situ real-time surface albedo measurement in agricultural fields
Source: Royal Society of Chemistry journal article supplement (doi:10.1039/d1va00051a), 2022-01-01
Supplement: d1va00051a2.pdf [file d1va00051a2.pdf]

TRUECOL\_SITEsentinel21c\_2021-02-23 2021-02-20 00:00 - 2021-02-20 23:59, Sentinel-2 L1C, True color
