# Supplementary material for: Portable apparatus for high spatial and temporal resolution of in situ real-time surface albedo measurement in agricultural fields
Source: Royal Society of Chemistry journal article supplement (doi:10.1039/d1va00051a), 2022-01-01
Supplement: d1va00051a3.pdf [file d1va00051a3.pdf]

SNOWCLASSIFIER-ndsi\_sentinel2\_2021-02-20SITES 2021-02-20 00:00 - 2021-02-20 23:59, Sentinel-2 L2A, Snow Classifier

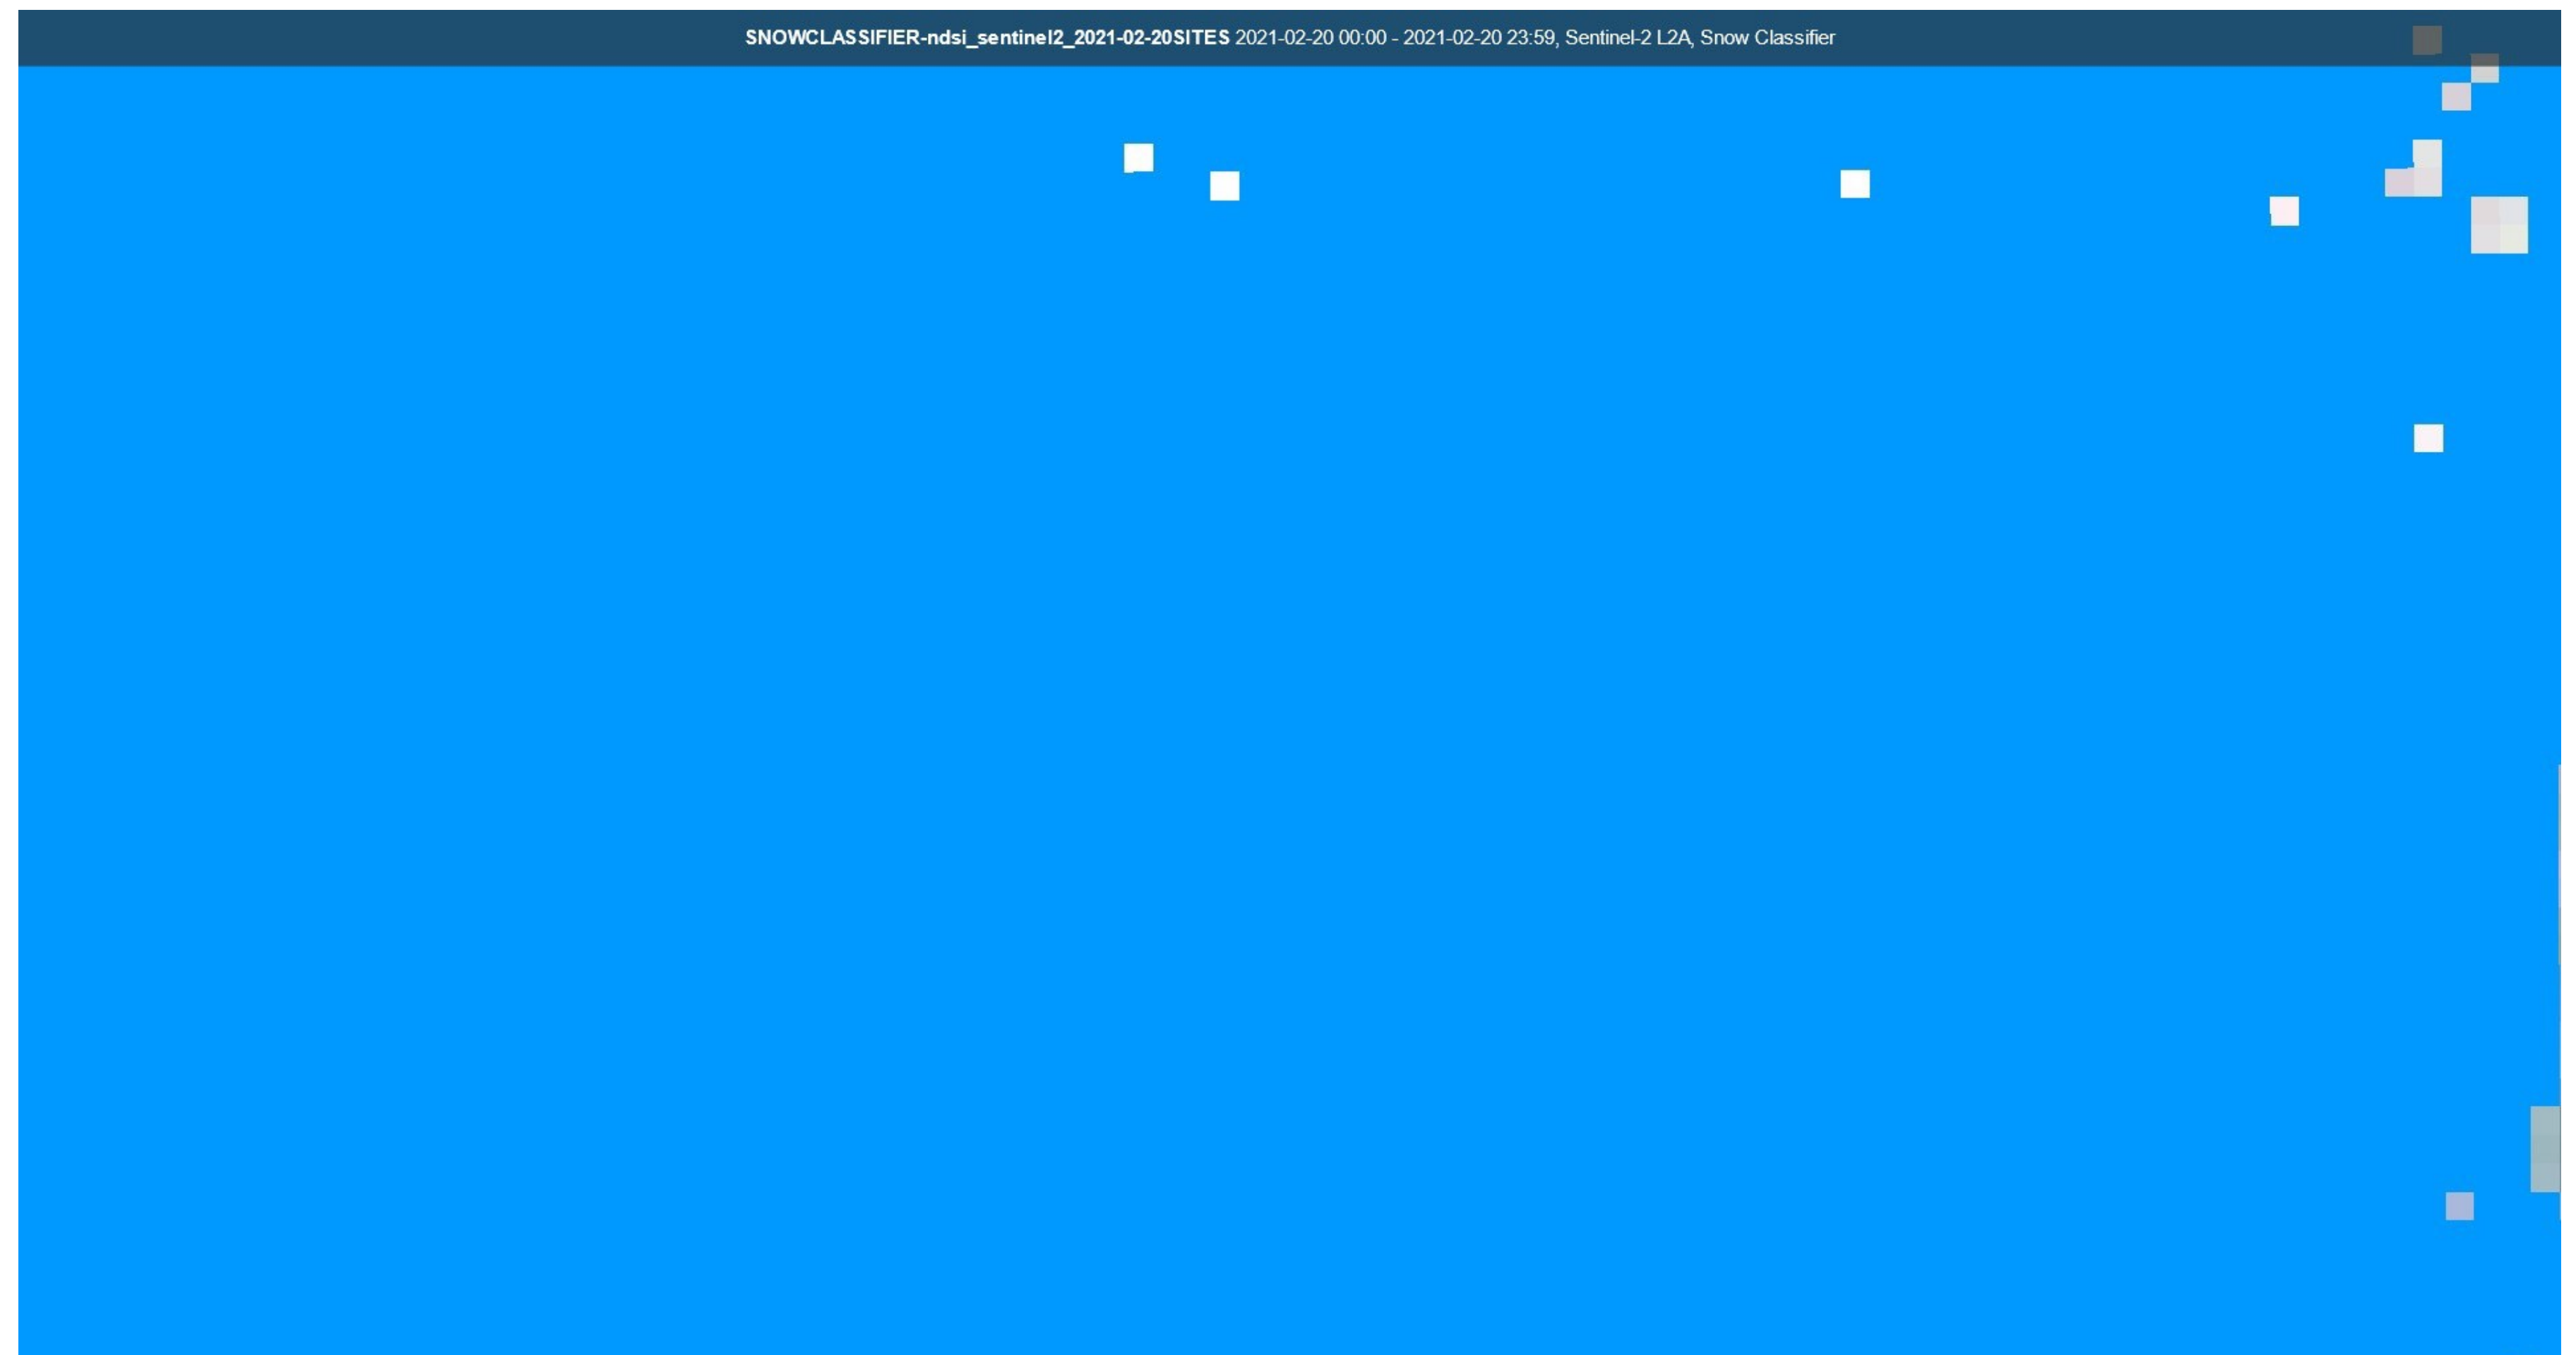

50 m

Credit: European Union, contains modified Copernicus Sentinel data 2022, processed with EO Browser
